# Supplementary material
Source: PubMed Central journal article supplement (PMC2947826)
Supplement: NIHMS229285-supplement-Supporting_Information.pdf [file NIHMS229285-supplement-Supporting_Information.pdf]

*Supporting Information:*

# Discrimination of Complex Mixtures by a Colorimetric Sensor Array: Coffee Aromas

Benjamin A. Suslick<sup>†§</sup>, Liang Feng<sup>†‡</sup>, Kenneth S. Suslick<sup>\*‡</sup>

Department of Chemistry, University of Illinois at Urbana-Champaign,  
600 S. Mathews Av., Urbana, IL 61801, and  
University Laboratory High School, University of Illinois at Urbana-Champaign,  
1212 W Springfield Av., Urbana, IL 61801

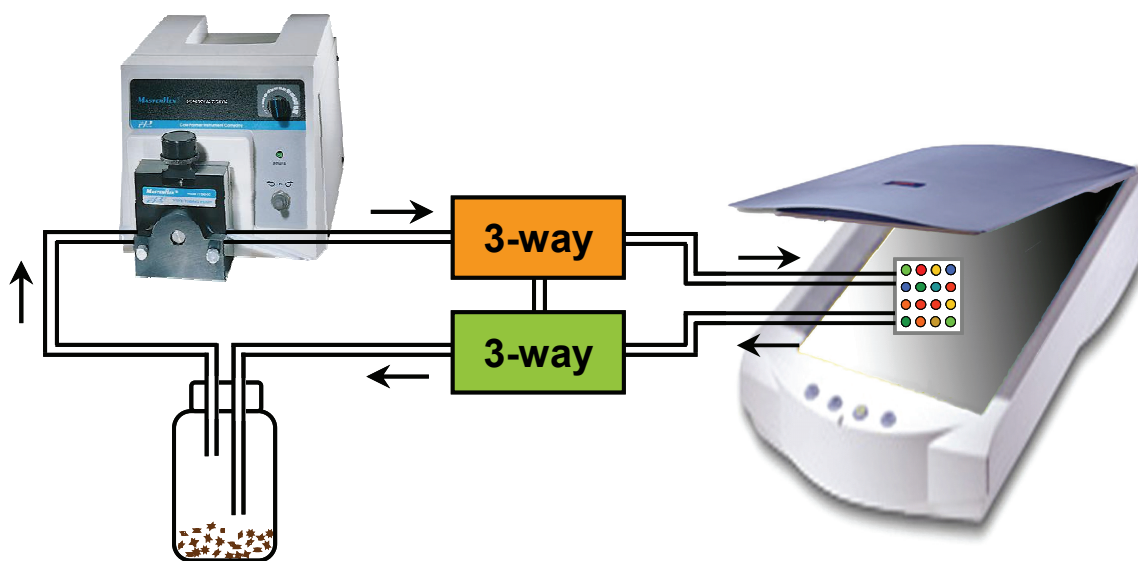

**Figure S1. The experimental set-up for coffee aroma testing.** The three-way valves allow one to presaturate coffee aroma gas reservoir and then divert the analyte stream to colorimetric sensor array.

\* Corresponding author: (tel) 1-217-333-2794; (fax) 1-217-333-2685; email: ksuslick@uiuc.edu

† Contributed equally to this work.

§ University Laboratory High School

‡ Dept. of Chemistry, University of Illinois at Urbana-Champaign

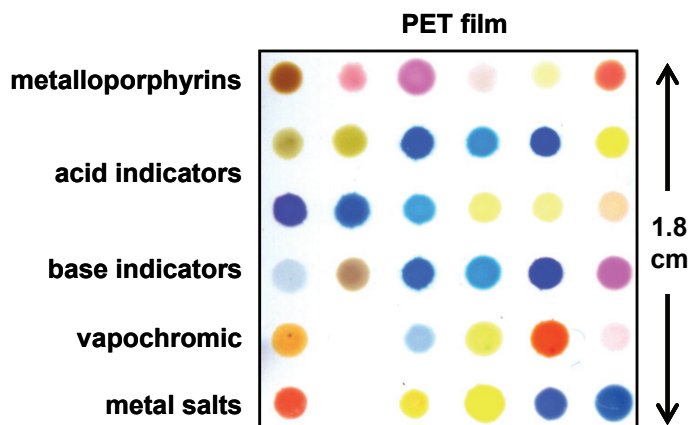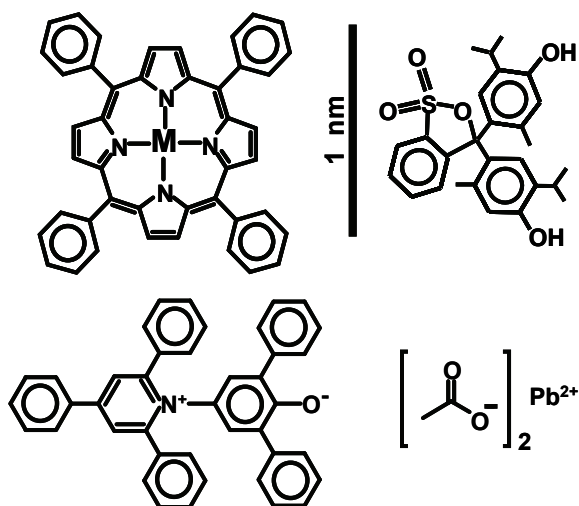

**Figure S2.** The colorimetric sensor array (CSA) consists of 36 different chemically responsive pigments that have been printed directly on a polyethylene terephthalate (PET) film. Examples of each dye class are shown; in order to absorb visible light, dyes are inherently nanoscale. The 36 dyes were selected empirically based on the quality of their color response to a representative selection of different analytes. Several of the dyes in the array are essentially transparent before exposure.

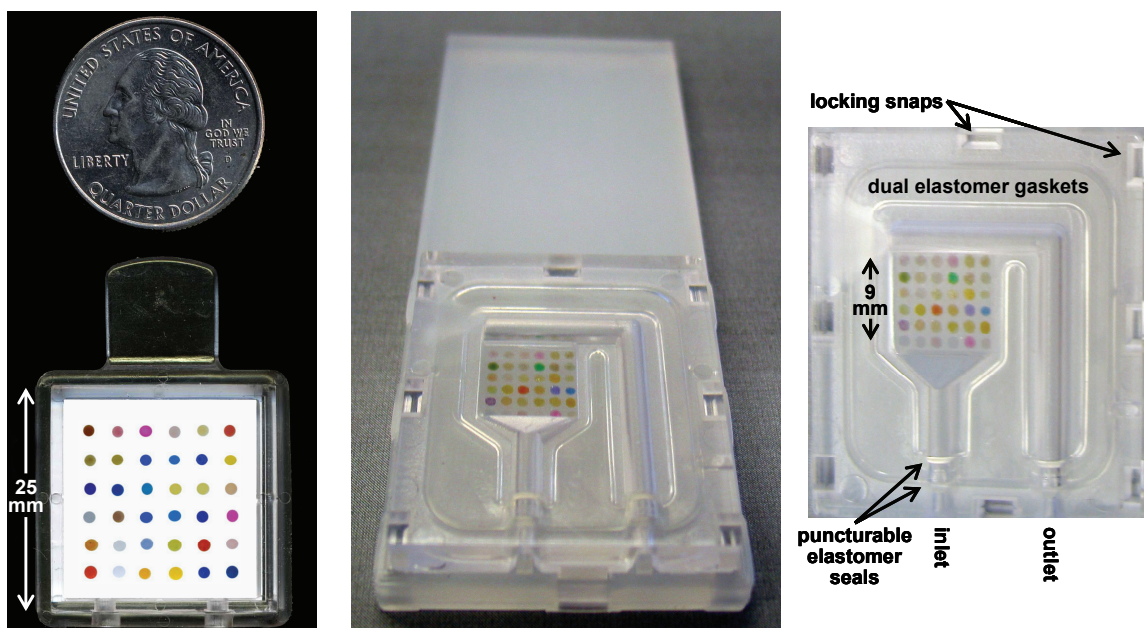

**Figure S3. Photographs of cartridge colorimetric sensor arrays, all on the same scale.** Left: standard disposable cartridge used in these studies; the inside dimensions are 22x22x4 mm with a total dead volume  $\sim$ 2 mL. Middle: disposable low dead-volume self-sealing cartridge with the colorimetric sensor array printed directly on a PET (polyethylene terephthalate) flat. Right: close-up of the low dead-volume printed colorimetric sensor array and sealing system. The total head-space volume of the low dead-volume cartridge is  $\sim$ 150  $\mu$ L (i.e.,  $>$ 10-fold smaller volume). The cartridges are produced by standard injection molding.

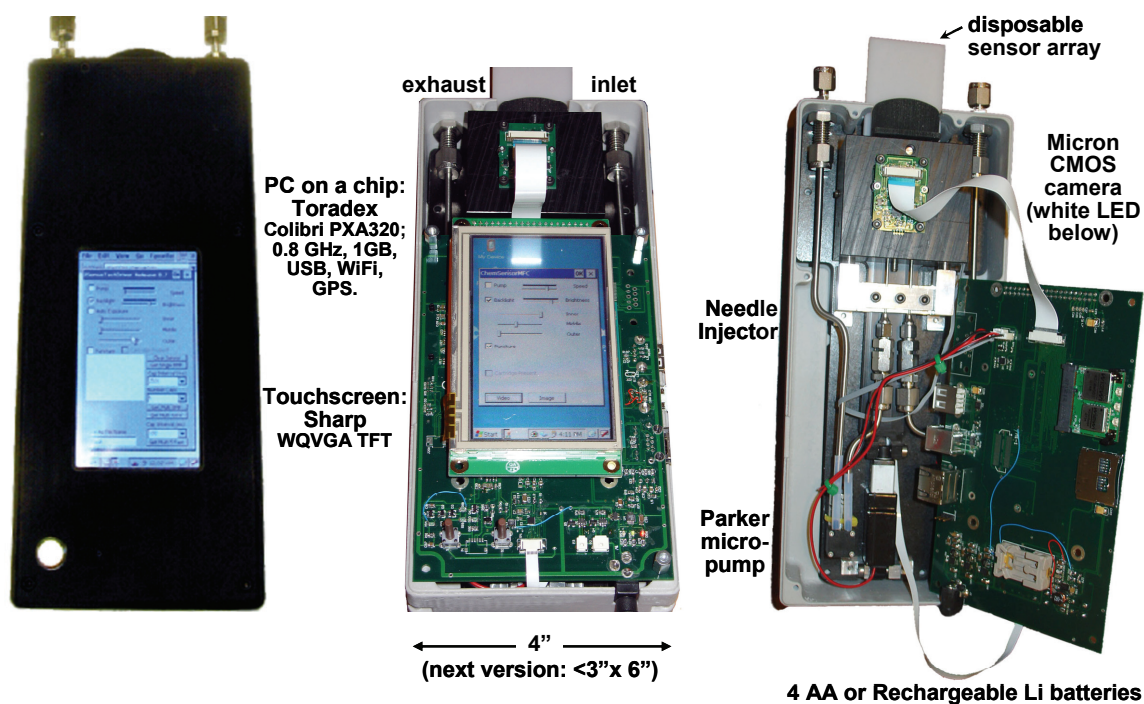

**Figure S4. Labeled photographs of a functional handheld prototype of the optoelectronic nose.** Left: the fully assembled unit; center: with top cover removed; right: top electronics board and touch-screen display lifted vertically to the right. The disposable sensor array used with this prototype is shown in Figure S3. The image quality of this prototype is considerably improved compared to the flat bed scanners used in this study (Epson Perfection V200); an improvement in S/N of a factor of 3 has been achieved even at this early stage of development.

**Table S1.** Chemoresponsive Colorants Used For Analysis of Coffee Aroma

| Spot # | Name                                                                        |
|--------|-----------------------------------------------------------------------------|
| 1      | 5,10,15,20-tetraphenylporphine zinc                                         |
| 2      | 5,10,15,20-tetrakis(2,4,6-trimethylphenyl)porphine zinc                     |
| 3      | 5,10,15,20-tetrakis(pentafluorophenyl)porphine zinc                         |
| 4      | 2,3,7,8,12,13,17,18-Octaethyl-21H,23H-porphine zinc(II)                     |
| 5      | 5,10,15,20-Tetraphenyl-21H,23H-porphine cobalt(II)                          |
| 6      | 5,10,15,20-tetrakis(2,4,6-trimethylphenyl)porphine cobalt (II)              |
| 7      | 5,10,15,20-Tetrakis(pentafluorophenyl)-21H,23H-porphyrin iron(III) chloride |
| 8      | 5,10,15,20-tetraphenylporphine chromium(III) chloride                       |
| 9      | Bromophenol Blue + TBAH                                                     |
| 10     | Bromocresol Green + TBAH                                                    |
| 11     | Bromocresol Purple + TBAH                                                   |
| 12     | Methyl Red + TBAH                                                           |
| 13     | Chlorophenol Red + TBAH                                                     |
| 14     | Nitrazine Yellow + TBAH                                                     |
| 15     | Bromothymol Blue + TBAH                                                     |
| 16     | Thymol Blue + TBAH                                                          |
| 17     | m-Cresol Purple + TBAH                                                      |
| 18     | Reichart's #3 + TBAH                                                        |
| 19     | Reichart's + TBAH                                                           |
| 20     | Zn(OAc) <sub>2</sub> + m-Cresol Purple + TBAH                               |
| 21     | HgCl <sub>2</sub> + Bromophenol Blue + TBAH                                 |
| 22     | HgCl <sub>2</sub> + Bromocresol Green + TBAH                                |
| 23     | Crystal Violet                                                              |
| 24     | Eosin Y                                                                     |
| 25     | Thymol Blue                                                                 |
| 26     | Methyl Orange                                                               |
| 27     | Pyranilium                                                                  |
| 28     | Tetraiodophenolsulfonephthalein                                             |
| 29     | Rosolic Acid                                                                |
| 30     | Disperse Orange #25                                                         |
| 31     | Disperse Red                                                                |
| 32     | Pb(OAc) <sub>2</sub>                                                        |
| 33     | Acridine Orange Base                                                        |
| 34     | LiNO <sub>3</sub> + Cresol Red                                              |
| 35     | AgNO <sub>3</sub> + Bromophenol Blue                                        |
| 36     | AgNO <sub>3</sub> + Bromocresol Green                                       |

TBAH: 1.0 M in 2-MeOEtOH

TsOH: 1.0 M in 2-MeOEtOH

**Table S2. Color Difference Database (10 coffee samples plus a control, different roasting temperature testing, and different roasting time testing)**

|             | R01       | R01       | R02       | G02       | B02       | R03       | G03       | B03       | R04        | G04       | B04       | R05       | G05        | R06       | G06       | R07       | G07       | R08       | G08       | B08       | R09       | G09       | B09       |           |           |
|-------------|-----------|-----------|-----------|-----------|-----------|-----------|-----------|-----------|------------|-----------|-----------|-----------|------------|-----------|-----------|-----------|-----------|-----------|-----------|-----------|-----------|-----------|-----------|-----------|-----------|
| Control T-1 | 0.450065  | 0.121735  | -0.373917 | 0.324631  | -0.191313 | -0.017338 | 0.617401  | -0.44928  | 0.704346   | 1.857972  | -0.347824 | -0.110153 | 2.519472   | 0.866669  | -0.669556 | 0.21943   | 0.013637  | 0.007843  | -0.097951 | -0.203745 | -0.309539 | -0.415332 | -0.521267 | -0.62892  | -0.732714 |
| Control T-2 | 0.801778  | 1.329463  | 0.673182  | 0.631882  | -0.524628 | -0.246388 | 0.626003  | -0.426086 | -0.246388  | 0.626003  | -0.426086 | -0.246388 | 0.626003   | -0.426086 | -0.246388 | 0.626003  | -0.426086 | -0.246388 | 0.626003  | -0.426086 | -0.246388 | 0.626003  | -0.426086 | -0.246388 |           |
| Control T-3 | 0.749248  | 0.99998   | 1.031876  | 0.939117  | -0.46666  | -0.60289  | 0.394211  | 0.478256  | -0.01738   | 0.162308  | 0.341906  | 0.814409  | 0.510147   | 1.488558  | 0.562317  | -0.13913  | 0.194781  | 0.111302  | 0.027822  | -0.055657 | -0.139136 | -0.222616 | -0.306905 | -0.388575 | -0.460013 |
| Control T-4 | -0.194692 | -0.318776 | 0.017395  | -0.141155 | -0.228973 | -0.260864 | -1.550735 | 2.229893  | -0.518829  | 0.081161  | 0.681151  | 0.162323  | -0.163253  | 0.158255  | 0.295954  | 0.329433  | 0.396804  | 0.433034  | 0.469265  | 0.505495  | 0.541725  | 0.577955  | 0.614186  | 0.650416  |           |
| Control T-5 | -0.86377  | 2.205795  | -0.614492 | 0.162323  | 0.77681   | -1.495651 | 1.826202  | 1.223183  | -2.324646  | 0.104355  | -0.478256 | 1.518837  | 0.292755   | 1.353622  | 0.41494   | 0.820297  | 0.44194   | 0.449272  | 2.144928  | -2.289856 | -1.342026 | 1.311053  | -1.194199 | 0.336233  |           |
| EOCCR T-1   | -2.70255  | -0.507248 | -1.202899 | 0.510147  | 5.765213  | -1.030725 | 1.431885  | 4.553627  | -6.688121  | 1.484055  | 0.237671  | 0.307236  | 1.13623    | 0.976822  | -0.150726 | -0.153625 | -0.089549 | 2.075359  | 0.710144  | -1.742035 | -4.310143 | -1.695648 | 0.582611  | -1.550726 |           |
| EOCCR T-2   | -2.12142  | 3.011993  | -0.020899 | -1.524643 | 7.733337  | -1.168406 | 0.849274  | 5.289856  | -9.49855   | 0.600006  | -0.220291 | -0.660658 | 1.684067   | 0.023193  | -0.156525 | 0.850349  | -0.263771 | 1.771015  | 0.672455  | 0.927595  | -1.589409 | -1.765219 | 1.571014  | -1.682609 |           |
| EOCCR T-3   | -1.350723 | 1.640579  | -0.04058  | 2.75636   | 3.156525  | -3.736229 | 1.989997  | 2.765212  | -5.301453  | 1.262002  | 1.942032  | 3.486969  | 0.495651   | 1.7971    | 0.2027    | 0.802936  | 0.623783  | -0.247063 | -0.507968 | 0.67247   | 2.020001  | 1.24058   | -6.336231 |           |           |
| EOCCR T-4   | -0.092758 | 1.918842  | -0.228985 | 0.623184  | 5.057968  | -1.140869 | 1.066661  | 4.591301  | -8.611588  | 0.75943   | 0.817383  | 1.133331  | 0.904358   | 0.513046  | -0.194199 | 0.73464   | -0.237679 | 0.449276  | 0.978607  | 0.829879  | 0         | -1.08696  | 0.895645  |           |           |
| EOCCR T-5   | -0.597107 | 2.623092  | -0.724638 | 0.895645  | 6.947823  | -0.68985  | 0.594208  | 3.484954  | -7.588409  | -0.005798 | -0.857971 | 1.243484  | 0.849493   | 2.469551  | 1.194199  | -0.276807 | 1.298538  | 1.002889  | -0.026089 | -0.298553 | 0.457977  | 1.930435  | -0.055073 |           |           |
| FCR T-1     | -1.168114 | -2.04579  | -1.64056  | -1.133894 | -1.742898 | -1.133894 | -1.742898 | -1.133894 | -1.742898  | -1.133894 | -1.742898 | -1.133894 | -1.742898  | -1.133894 | -1.742898 | -1.133894 | -1.742898 | -1.133894 | -1.742898 | -1.133894 | -1.742898 | -1.133894 | -1.742898 | -1.133894 |           |
| FCR T-2     | -1.510147 | 1.075559  | -1.350725 | 2.268957  | 0.066673  | -10.95652 | 1.110138  | 3.884056  | -6.915939  | -0.055099 | 0.817383  | 1.10144   | 0.744934   | 0.034775  | -0.547829 | -0.568115 | -1.023193 | 2.185049  | 0.600445  | 1.15936   | 0.620289  | -0.608688 | 0.623184  | 0.127537  |           |
| FCR T-3     | -1.530333 | 2.101416  | -0.750725 | -1.36232  | 6.17971   | -0.952177 | -0.402908 | 3.701454  | -6.507248  | 0.318832  | 0.831879  | -1.388118 | -2.00012   | 0.614487  | -0.41449  | -0.55072  | 1.1884    | 1.455074  | 1.06217   | -0.231888 | 0.11594   | -0.055069 | 0.32753   | -0.49855  |           |
| FCR T-4     | -1.530441 | 3.22319   | -1.571014 | -3.28279  | 14.14493  | -0.127609 | 0.779709  | 6.521744  | -11.05738  | 0.440582  | 0.852173  | -1.33823  | 1.382599   | -1.272461 | -0.260864 | 1.752329  | 2.547825  | 0.70245   | 0.252167  | 1.011904  | 0.310334  | 0.0738    | 0.675364  | 0.66087   |           |
| FCR T-5     | -2.553919 | 3.04348   | -0.623188 | -2.20276  | 16.92114  | -18.48695 | -0.46666  | 9.417389  | -13.837168 | -0.162323 | -0.191315 | 2.00012   | -1.663757  | -0.805801 | -1.573914 | -2.401585 | 0.234783  | 4.440582  | 1.130447  | 1.211594  | 0.388405  | -1.240585 | -0.573898 | 0.121739  |           |
| SER T-1     | -4.82029  | 3.759422  | -0.463788 | 6.405792  | 18.45797  | -20.34782 | -0.446381 | 7.423187  | -11.06807  | -0.294058 | -0.542038 | -0.359421 | -1.006898  | 1.205795  | -1.98262  | -3.800003 | -1.602288 | 3.49855   | -7.33337  | -0.463776 | -0.136234 | -0.77681  | 0.175942  | 0.756519  |           |
| SER T-2     | -4.37917  | 4.330433  | -0.049275 | 6.268957  | 12.86348  | -17.53912 | 12.86348  | -17.53912 | 12.86348   | -17.53912 | 12.86348  | -17.53912 | 12.86348   | -17.53912 | 12.86348  | -17.53912 | 12.86348  | -17.53912 | 12.86348  | -17.53912 | 12.86348  | -17.53912 | 12.86348  | -17.53912 |           |
| SER T-3     | -2.83768  | 2.913044  | -1.544927 | -5.49855  | 14.88985  | -20.13043 | -0.388412 | 7.356522  | -13.68985  | -0.623184 | -0.60289  | -0.249293 | -0.428986  | 0.765228  | -0.260864 | -0.859412 | -0.831886 | 1.678261  | 0.043488  | -0.072464 | -0.214493 | -1.92602  | 0.336227  |           |           |
| SER T-4     | -2.797096 | 2.971016  | -0.623188 | -4.408707 | 11.74203  | -17.4     | -0.753632 | 6.173912  | -10.48697  | -1.24638  | -0.260864 | -0.289856 | -1.402893  | -1.173904 | -1.205795 | -2.927536 | -1.962318 | 2.011593  | -1.197088 | 0.324638  | -0.446381 | -0.518845 | 0.579708  |           |           |
| SER T-5     | -4.388405 | 3.921738  | -1.356522 | -7.220276 | 16.92114  | -18.48695 | -0.46666  | 9.417389  | -13.837168 | -0.162323 | -0.191315 | 2.00012   | -1.663757  | -0.805801 | -1.573914 | -2.401585 | 0.234783  | 4.440582  | 1.130447  | 1.211594  | 0.388405  | -1.240585 | -0.573898 |           |           |
| SSR T-1     | -4.92029  | 3.759422  | -0.463788 | 6.405792  | 18.45797  | -20.34782 | -0.446381 | 7.423187  | -11.06807  | -0.294058 | -0.542038 | -0.359421 | -1.006898  | 1.205795  | -1.98262  | -3.800003 | -1.602288 | 3.49855   | -7.33337  | -0.463776 | -0.136234 | -0.77681  | 0.175942  |           |           |
| SSR T-2     | -4.37917  | 4.330433  | -0.049275 | 6.268957  | 12.86348  | -17.53912 | 12.86348  | -17.53912 | 12.86348   | -17.53912 | 12.86348  | -17.53912 | 12.86348   | -17.53912 | 12.86348  | -17.53912 | 12.86348  | -17.53912 | 12.86348  | -17.53912 | 12.86348  | -17.53912 | 12.86348  |           |           |
| SSR T-3     | -2.397095 | 3.54493   | -1.031884 | -3.304352 | 15.91694  | -19.8174  | 1.310135  | 7.875507  | -13.80579  | 0.823181  | 0.565216  | 0.382614  | 0.60289    | 1.088541  | -0.855072 | -2.475372 | -1.81739  | 1.811592  | 1.127533  | 0.988411  | 0.988407  | 0.353622  | 0.713043  |           |           |
| SSR T-4     | -4.304352 | 2.69957   | -1.881159 | -4.915939 | 15.16522  | -20.90145 | -0.20088  | 9.416281  | -15.95651  | -0.69565  | -0.197113 | -1.73904  | -1.228973  | -1.947815 | -3.56551  | -1.953629 | -2.178811 | 2.643978  | -0.608704 | -0.307261 | -1.89569  | -0.214493 | 0.628986  |           |           |
| SSR T-5     | -3.211594 | 4.171013  | -0.234348 | -5.443481 | 16.88117  | -23.24348 | -0.918839 | 9.446381  | -16.79419  | -1.043472 | -0.559418 | -0.681168 | -1.50145   | -2.496231 | -1.44928  | -1.678268 | -2.27428  | 3.553623  | 0.34352   | 0.255081  | -0.092743 | -0.274276 | 1.63285   |           |           |
| SCR T-1     | -2.675362 | 4.686956  | -2.342029 | 3.823196  | 18.18261  | -20.61159 | 1.313034  | 5.631882  | -8.685648  | 1.072464  | 0.530441  | 0.194199  | 0.292755   | 0.91304   | -1.18835  | -1.940576 | -0.591305 | 2.13913   | 0.979706  | 1.052185  | 0.678261  | 0.237686  | 1.295622  |           |           |
| SCR T-2     | -0.51039  | 2.02898   | -2.672468 | -2.068945 | 12.04058  | -17.31014 | 0.249484  | 16.23323  | -3.842041  | 1.255081  | 0.585819  | 0.107239  | -0.429068  | 0.936218  | -1.397102 | -2.342026 | -2.29889  | 0.539131  | 0.811594  | -0.57386  | 0.33328   | 0.73912   | 0.84489   |           |           |
| SCR T-3     | -4.434784 | 1.200001  | -0.423175 | -2.223175 | 13.13304  | -18.29276 | 1.565216  | 10.04581  | -12.82318  | 2.031876  | 1.98997   | -0.582611 | -0.437683  | -3.978258 | -0.005798 | -3.978258 | 2.481159  | 0.178842  | -0.452179 | 0.805798  | -0.192602 | 0.976807  | 0.184086  |           |           |
| SCR T-4     | -2.014468 | 2.423187  | -1.452174 | -2.829886 | 13.70145  | -19.15246 | 0.518845  | 4.295647  | -6.553619  | 0.77681   | 0.608668  | 1.330429  | 0.892761   | 0.452179  | -1.32753  | -0.631882 | -0.643478 | 1.689854  | 0.072464  | 0.446323  | 0.582607  | 0.3797    | 0.295654  |           |           |
| SCR T-5     | -2.675362 | 3.537681  | -0.92029  | -8.85377  | 18.75073  | -20.81449 | 0.837673  | 6.437683  | -8.901459  | 0.93824   | 0.739136  | -1.05217  | -0.13331   | 1.03475   | -2.04348  | -2.342026 | -2.69073  | 2.130436  | 1.56525   | 1.049274  | -0.043472 | 0.446381  | 0.008986  |           |           |
| EOCHN T-1   | -2.752464 | 1.220291  | -2.834771 | 4.260872  | -11.12174 | -10.42683 | 2.927536  | -1.56525  | -6.005789  | -1.33622  | 1.571014  | 1.447827  | -0.3501445 | -0.570878 | 0.32068   | 0.753616  | 0.86337   | 1.002889  | -0.530426 | -0.478468 | 0.198839  | 0.40058   | -8.508697 |           |           |
| EOCHN T-2   | -2.397102 | 2.927536  | -0.063768 | -2.553619 | 9.927544  | -17.10436 | -0.50145  | 4.478256  | -9.417389  | 0.295657  | -0.263779 | -1.872467 | -0.281158  | 0.518845  | -2.562317 | -1.553619 | -1.944923 | 1.45507   | 0.588409  | 0.31015   | 0.518537  | -0.828985 | 0.099565  |           |           |
| EOCHN T-3   | -2.162315 | 2.826084  | -0.922754 | -3.246368 | 10.13043  | -12.84348 | 1.199997  | 5.994209  | -9.452179  | 0.066686  | 0.205795  | 0.162323  | -0.344925  | 0.63768   | -1.1      | -2.006869 | -2.211594 | 0.452175  | -0.376816 | -0.234772 | -1.828983 | 0.165222  |           |           |           |
| EOCHN T-4   | -1.86087  | 2.02898   | -0.269565 | -2.918839 | 8.072464  | -13.47537 | -0.684067 | 3.872459  | -8.130432  | -0.843475 | -0.675354 | -0.689666 | -1.42029   | -1.275334 | 1.043476  | 0.191315  | 0.226089  | -0.150726 | -1.118835 | -0.072464 | 0.292751  | 3.333333  |           |           |           |
| EOCHN T-5   | -1.655075 | 2.573914  | -0.057871 | -2.188416 | 9.468953  | -16.68986 | 0.455063  | 7.275368  | -13.29565  | 1.849274  | 0.707245  | 0.055069  | 1.507335   | 1.110153  | -2.385498 | 0.460861  | -1.321768 | -0.19718  | -0.492752 | -1.295654 | -0.104355 | -0.34749  |           |           |           |
| MHORD T-1   | -0.797096 | -0.599998 | -2.402689 | 2.05792   | 2.907242  | -8.026093 | 3.28957   | 5.284065  | -6.37102   | 3.089     |           |           |            |           |           |           |           |           |           |           |           |           |           |           |           |

Roasting Temperature Test

Table with 10 columns (NR T-1 to 240C T-5) and 100 rows of numerical data representing temperature test results.

Roasting Time Test

Table with 10 columns (1min Roast T-1 to 45min Roast T-5) and 100 rows of numerical data representing roasting time test results.

Steepening

|             | R10       | R11       | G11       | B11       | R12       | G12        | B12       | R13       | G13       | B13       | R14       | G14       | B14       | R15       | G15       | B15       | R17       | G17       | B17       | R18       | G18       | B18       |           |           |           |           |           |          |
|-------------|-----------|-----------|-----------|-----------|-----------|------------|-----------|-----------|-----------|-----------|-----------|-----------|-----------|-----------|-----------|-----------|-----------|-----------|-----------|-----------|-----------|-----------|-----------|-----------|-----------|-----------|-----------|----------|
| Control T-1 | -0.944301 | -1.050095 | -1.216683 | -1.057026 | -0.118835 | -0.072464  | -0.292751 | 0.718942  | 1.156609  | 0.617393  | 0.956663  | 0.234787  | 0.744926  | 4.594203  | 3.778259  | 0.927536  | 0.162319  | -2.005796 | 1.586409  | -1.752019 | 1.571014  | -0.211595 | -0.301449 | -0.096657 |           |           |           |          |
| Control T-2 | 1.212744  | 1.274553  | 1.332162  | 1.391871  | 1.451581  | -0.492752  | -1.259654 | -0.104355 | -0.785507 | 0.63768   | 0.124638  | 0.034348  | -0.87825  | 4.315942  | 3.469276  | 0.802902  | 0.234783  | -0.057968 | 0.67247   | 0.200001  | 1.24058   | -0.153623 | -0.301449 | -0.096657 |           |           |           |          |
| Control T-3 | -0.723492 | -0.806972 | -0.890451 | -0.97393  | -1.05741  | 1.72464    | -1.689657 | 2.86948   | 1.330429  | -1.456655 | 0.681152  | 0.072644  | 0.692755  | 0.089599  | 0.104496  | 0.162319  | 1.939131  | 1.349276  | 0.828979  | 0         | -1.08696  | 0.895645  | -0.797911 | 2.82029   | -0.066667 | -0.26087  | 1.081161  |          |
| Control T-4 | 0.723077  | 0.795507  | 0.795337  | 0.831568  | 0.867798  | 1.586394   | 0.620285  | 0.56232   | 0.562616  | 0.866669  | 1.089844  | 0.521736  | 0.904343  | 0.542023  | 0.031885  | 3.315942  | 2.895861  | 1.002899  | -0.026089 | -0.286587 | 0.457977  | -0.992809 | 1.930435  | 0.655072  | 0.077392  | 1.446346  |           |          |
| EOCCR T-1   | 0.113004  | 0.296553  | 0.101453  | 0.147826  | -1.791298 | 1.75943    | 0.263771  | 0.304349  | -0.108855 | 17.56522  | -7.623128 | -23.79421 | -13.97391 | -12.20029 | 2.91041   | -1.857971 | -13.97971 | 0.324775  | 5.788127  | -8.98552  | 12.0058   | 14.41159  | 5.605789  |           |           |           |           |          |
| EOCCR T-2   | -0.005797 | -17.3913  | -3.956528 | 4.727536  | 9.510145  | -28.44638  | 10.21739  | -4.481155 | -0.078261 | 11.22609  | -4.2      | -35.59709 | 0.145942  | 1.100434  | -16.46667 | -28.69275 | 5.668073  | -1.371002 | -0.808701 | 11.93823  | 3.301453  | 9.452179  | 19.8815   | -18.30724 | -1.422896 |           |           |          |
| EOCCR T-3   | 0.008696  | -16.51884 | -3.342041 | 5.052174  | -9.733334 | -25.28986  | 10.53334  | -0.25798  | -10.1652  | 10.9632   | -2.217392 | -19.9913  | -0.142029 | 1.97971   | -16.94375 | 8.124638  | -13.06667 | -16.99492 | -0.598424 | -0.004927 | 0.489274  | -0.617401 | -17.45796 | 15.69506  | -2.684056 |           |           |          |
| EOCCR T-4   | 0.040458  | -16.07246 | -3.08696  | 6.594203  | -12.28696 | -23.3768   | 12.75362  | -2.704361 | -18.64928 | 13.5797   | -1.710144 | -21.46668 | 0.663768  | 0.857971  | -10.37072 | 11.76232  | -9.710152 | -17.25218 | 1.031015  | -1.869645 | -15.53043 | 1.226074  | -1.43187  | 15.05797  | 1.371071  |           |           |          |
| EOCCR T-5   | 0.008696  | -16.07246 | -3.08696  | 6.594203  | -12.28696 | -23.3768   | 12.75362  | -2.704361 | -18.64928 | 13.5797   | -1.710144 | -21.46668 | 0.663768  | 0.857971  | -10.37072 | 11.76232  | -9.710152 | -17.25218 | 1.031015  | -1.869645 | -15.53043 | 1.226074  | -1.43187  | 15.05797  | 1.371071  |           |           |          |
| FOR T-1     | 0.005797  | -13.4058  | -3.191515 | 4.00896   | 7.495653  | -33.98281  | 9.460876  | -7.391312 | -13.15652 | 15.96812  | -0.631884 | -19.2058  | 2.915942  | 2.362136  | 22.95363  | 0.8058    | -0.414487 | -21.64348 | 10.92754  | -0.231888 | -16.50725 | 9.91304   | 7.99986   | -5.571014 | 10.85217  | 15.9971   | 11.43189  |          |
| FOR T-2     | 0         | -13.05217 | -3.753632 | -7.396232 | 7.396232  | -34.18262  | 11.22319  | -6.94277  | -9.510044 | 12.79303  | -3.385509 | -12.28986 | 11.87536  | -3.22319  | -11.47463 | 8.64927   | -2.313034 | -17.3034  | -16.76521 | 1.994202  | 5.698704  | -6.431885 | 6.336243  | 11.31904  | 11.93044  |           |           |          |
| FOR T-3     | 0.002899  | -11.54783 | -2.376801 | 6.988551  | -8.046377 | -34.18262  | 11.22319  | -6.94277  | -9.510044 | 12.79303  | -3.385509 | -12.28986 | 11.87536  | -3.22319  | -11.47463 | 8.64927   | -2.313034 | -17.3034  | -16.76521 | 1.994202  | 5.698704  | -6.431885 | 6.336243  | 11.31904  | 11.93044  |           |           |          |
| FOR T-4     | 0         | -11.17392 | 0.582173  | 6.988406  | -8.162319 | -27.61739  | 13.18282  | -4.901443 | -10.62609 | 16.68696  | -10.14492 | 21.22319  | 2.434763  | 0.34203   | 15.90146  | 15.86896  | 2.356522  | -19.08116 | 13.75363  | 3.115952  | -16.84538 | 15.8232   | 6.121735  | -6.572466 | 8.536224  | 11.57681  | 11.39989  |          |
| FOR T-5     | 0.020229  | -14.34782 | -2.402908 | 5.533333  | -8.046375 | -36.8053   | 13.48407  | -10.74204 | -5.214493 | 16.68955  | -4.92754  | -25.89896 | 11.65622  | 20.05217  | 4.899544  | -27.91631 | 18.89275  | 4.875386  | -21.1739  | 11.90434  | -1.13037  | -15.54493 | 9.953629  | 6.330428  | -4.350723 | 13.85507  | 14.24928  |          |
| SER T-1     | 0         | -12.35352 | -0.669571 | 5.652118  | -6.985056 | -31.30724  | 10.48985  | -10.71884 | -6.130449 | 15.89275  | -4.52173  | -19.23187 | 8.762319  | 6.04348   | -16.30725 | 6.040581  | 6.04348   | -16.30725 | 6.040581  | 6.04348   | -16.30725 | 6.040581  | 6.04348   | -16.30725 | 6.040581  | 6.04348   | -16.30725 | 6.040581 |
| SER T-2     | 0.055072  | -11.27536 | 0.634781  | 4.144828  | -7.686954 | -30.86405  | 9.869568  | -8.614487 | -6.97971  | 14.96812  | -1.852175 | -20.05607 | 2.742029  | 1.594204  | -21.26565 | 14.02319  | 3.142029  | -18.46895 | 15.33043  | 3.197098  | -15.24058 | 14.42609  | 8.782608  | -8.41449  | 10.16653  | 15.63319  | 13.16232  |          |
| SER T-3     | 0         | -15.08986 | -1.22319  | 3.768812  | -8.602898 | -32.1826   | 9.849274  | -7.614487 | -6.97971  | 13.48696  | -1.953023 | -19.99111 | 11.3913   | 1.533333  | 17.66987  | 13.44928  | 0.006986  | -11.59711 | 13.33624  | 1.597107  | -15.93043 | 11.03479  | 8.518845  | -4.568115 | 8.66377   | 14.46376  | 11.194703 |          |
| SER T-4     | 0         | -13.66377 | -3.690387 | 6.05797   | -6.459653 | -26.56522  | 12.75362  | -2.923638 | 13.3942   | -1.987101 | -19.30725 | 1.385507  | 0.550724  | -19.54022 | 11.86807  | 1.165215  | -21.49228 | 11.16811  | 10.869397 | -15.44428 | 11.59421  | 0.816985  | -5.68114  | 7.957092  | 12.30145  | 7.722319  | 11.72942  |          |
| SER T-5     | 0.057971  | -12.90144 | 1.481155  | 5.95218   | -8.501448 | -28.66697  | 10.7393   | -6.807904 | -11.38841 | 13.98841  | -1.289554 | -1.289554 | 2.255073  | 3.565216  | -18.86667 | 16.64348  | 2.895653  | -19.33623 | 15.3624   | 2.623184  | -16.2029  | 14.89565  | 10.42609  | -5.94203  | 7.73911   | 13.16812  | 10.43768  |          |
| SSR T-1     | 3.582009  | -9.42206  | 3.37017   | 7.588406  | -4.278259 | -19.97391  | 7.237671  | -7.073911 | -15.05218 | 19.03768  | 2.942032  | -13.96261 | 4.504348  | 4.76917   | -18.72464 | 25.10435  | 7.753632  | -20.93044 | 2.95654   | 4.006898  | -12.25507 | 8.785607  | 1.625507  | 5.07827   | 7.684067  | 3.231888  |           |          |
| SSR T-2     | 4.784065  | -0.2232   | 3.865219  | 1.130435  | -5.246376 | -25.79421  | 6.93334   | -7.962311 | -11.01159 | 21.49276  | 1.669363  | -18.28986 | 7.339131  | 4.260872  | -32.52754 | 25.17971  | 8.17392   | -23.77101 | 12.96521  | 3.298553  | -14.17971 | 10.53334  | 6.208684  | -7.782608 | 5.49855   | 9.072464  | 6.530441  |          |
| SSR T-3     | 3.73913   | -8.831886 | 2.524643  | 7.768116  | -2.573914 | -18.20286  | 8.376816  | -5.118851 | -5.118851 | 17.42203  | 2.281158  | -16.30725 | 6.040581  | 6.04348   | -16.30725 | 6.040581  | 6.04348   | -16.30725 | 6.040581  | 6.04348   | -16.30725 | 6.040581  | 6.04348   | -16.30725 | 6.040581  | 6.04348   | -16.30725 | 6.040581 |
| SSR T-4     | 4.475362  | -9.30435  | 1.214493  | 8.788406  | -5.246376 | -22.1739   | 7.657974  | -4.162323 | -9.002897 | 18.11884  | -0.820209 | -20.16522 | 3.165218  | 10.74203  | 15.46666  | 18.05752  | 11.02609  | -22.25797 | 12.96521  | 1.343321  | -14.80229 | 10.98754  | 6.208684  | -7.782608 | 5.49855   | 9.072464  | 6.530441  |          |
| SSR T-5     | 4.727536  | -9.2464   | 2.24579   | 9.944927  | -3.759418 | -12.127536 | 7.779311  | -6.08996  | -9.263767 | 23.3333   | 1.289896  | -18.41159 | 7.82908   | 7.13044   | -32.68112 | 10.34782  | -24.32755 | 11.89275  | 4.771101  | -15.15652 | 11.61739  | 5.849274  | -8.657974 | 5.73926   | 7.507248  | 3.13623   |           |          |
| SCR T-1     | 0.011594  | -15.35352 | 0.406691  | 2.194203  | -8.080694 | -29.48695  | 10.56522  | -14.08116 | -10.81159 | 13.94203  | -4.52173  | -19.23187 | 8.762319  | 6.04348   | -16.30725 | 6.040581  | 6.04348   | -16.30725 | 6.040581  | 6.04348   | -16.30725 | 6.040581  | 6.04348   | -16.30725 | 6.040581  | 6.04348   | -16.30725 | 6.040581 |
| SCR T-2     | 0         | -15.51594 | 1.026077  | 8.43478   | -7.182608 | -30.86405  | 8.402908  | -4.1884   | -6.892754 | 15.37102  | -1.675362 | -21.94782 | 4.417392  | 13.35942  | 4.756523  | -21.69275 | 13.78261  | 12.42889  | 11.43343  | -13.94203 | 14.82289  | 11.43343  | -13.94203 | 14.82289  | 11.43343  | -13.94203 | 14.82289  |          |
| SCR T-3     | 0.023188  | -14.88117 | -1.3623   | 3.27681   | -6.504347 | -28.73334  | 9.440582  | -14.26666 | -0.2      | 14.33913  | -3.30723  | -20.46866 | 2.069565  | 4.017391  | -25.53044 | 9.805798  | 1.823189  | -21.51303 | 15.84058  | 3.36551   | -14.11015 | 13.23218  | 11.03289  | -4.97256  | 17.2058   | 18.68405  | 7.40002   |          |
| SCR T-4     | 0.011594  | -13.83478 | 1.391312  | 3.510145  | -8.443478 | -30.90146  | 11.62318  | -13.86888 | -3.54927  | 14.13043  | -1.289554 | -1.289554 | 2.255073  | 3.565216  | -18.86667 | 16.64348  | 2.895653  | -19.33623 | 15.3624   | 2.623184  | -16.2029  | 14.89565  | 10.42609  | -5.94203  | 7.73911   | 13.16812  | 10.43768  |          |
| SCR T-5     | 1.956522  | -11.02319 | -1.055069 | 7.292754  | -7.29565  | -28.54782  | 4.87536   | -15.30435 | -14.98841 | 23.0058   | 5.281158  | -20.33043 | 7.875362  | 11.13043  | -36.66087 | 43.14203  | 12.0174   | -28.27536 | 5.39142   | -0.457977 | -15.13043 | 4.26086   | 1.08707   | -7.1304   | 5.214493  | 10.84348  | 6.7247    |          |
| EOCHN T-1   | 3.434783  | -11.38841 | -0.869568 | 8.043478  | -5.321739 | -27.20069  | 9.849431  | -16.43768 | -12.39565 | 25.75942  | 5.846378  | -27.06377 | 4.426087  | 12.30145  | -46.72464 | 43.86087  | 14.05507  | -32.15073 | 8.704346  | 7.96237   | -16.0145  | 5.771027  | 2.394196  | -0.26377  | 6.03479   | 11.52464  | 7.269562  |          |
| EOCHN T-2   | 2.66087   | -11.36232 | -1.452164 | 8.52173   | -5.61739  | -24.44057  | 4.171005  | -14.12753 | -13.28986 | 21.92174  | 5.304348  | -20.73912 | 4.411594  | 6.41449   | -33.79421 | 41.4116   | 12.64638  | -29.44928 | 6.133331  | 1.553635  | -14.48116 | 4.91304   | 1.142029  | -9.90435  | 4.243469  | 8.507248  | 4.556519  |          |
| EOCHN T-3   | 1.855072  | -11.6116  | -1.939133 | 7.524638  | -6.359421 | -26.22889  | 4.060867  | -13.77103 | -13.33043 | 21.51884  | 2.704346  | -25.04928 | 7.104347  | 10.08896  | -39.91594 | 36.92464  | 11.57391  | -30.48697 | 5.892761  | 0.759415  | -14.77682 | 4.742035  | 2.121735  | -6.54203  | 5.626083  | 11.75942  | 5.333328  |          |
| EOCHN T-4   | 3.936232  | -10.29565 | 1.51953   | 10.47536  | -6.089569 | -23.85219  | 6.69556   | -17.70114 | -15.74783 | 27.75362  | 5.794201  | -23.91594 | 13.59131  | 12.22319  | -39.34203 | 53.64637  | 18.07536  | -29.14203 | 6.240585  | 3.05217   | -11.98841 | 9.233196  | 6.855072  | -6.472466 | 7.515945  | 9.643464  | 8.829995  |          |
| EOCHN T-5   | 4.515942  | -10.29565 | 1.469574  | 10.95072  | -5.205799 | -19.59421  | 9.240585  | -8.234787 | -10.53913 | 24.16522  | 2.91045   | -21.8145  | 4.626087  | 6.64493   | -33.79421 | 41.4116   | 12.64638  | -29.44928 | 6.133331  | 1.553635  | -14.48116 | 4.91304   | 1.142029  | -9.90435  | 4.243469  | 8.507248  | 4.556519  |          |
| MHORD T-1   | 3.637681  | -11.54202 | 0.768127  | 7.902746  | -6.191303 | -27.0029   | 7.420288  | -13.66087 | -10.15942 | 24.44483  | 4.005798  | -21.57101 | 7.011595  | 9.379707  | -32.36522 | 31.84058  |           |           |           |           |           |           |           |           |           |           |           |          |



Roasting Temperature Test

Table with 18 columns (NR T-1 to 240C T-5) and 18 rows (R10 to R18). Each cell contains a numerical value representing a data point for a specific roast and temperature.

Roasting Time Test

Table with 18 columns (1min Roast T-1 to 45min Roast T-3) and 18 rows (R10 to R18). Each cell contains a numerical value representing a data point for a specific roast and time.

Steeping Information

Steeping Information: A vertical text element on the right side of the page, likely providing additional context or instructions related to the data presented.



Roasting Temperature Test

Table with 19 columns (R19-R7) and 40 rows (NR 1-240C 5). Each cell contains a numerical value representing a data point for a specific roast and temperature.

Roasting Time Test

Table with 19 columns (R19-R7) and 40 rows (1min Roast 1-240C 5). Each cell contains a numerical value representing a data point for a specific roast and time.

Roasting Information

0.057668 0.057668 0.057668 0.057668 0.057668 0.057668 0.057668 0.057668 0.057668 0.057668 0.057668 0.057668 0.057668 0.057668 0.057668 0.057668 0.057668 0.057668 0.057668



Roasting Temperature Test

Table with 36 columns (NR T-1 to 240C T-5) and 36 rows of numerical data representing temperature test results.

Roasting Time Test

Table with 36 columns (1min Roast T-1 to 240C T-5) and 36 rows of numerical data representing roasting time test results.

Stacking Information

Informational text located at the bottom right of the page, likely providing details about the data or the process.
